# Supplementary material for: Effects of Action Observation Plus Motor Imagery Administered by Immersive Virtual Reality on Hand Dexterity in Healthy Subjects
Source: MDPI journal article supplement (doi:10.3390/bioengineering11040398), 2024-04-19
Supplement: s1 [file s1]

**Table S1.** Comparison between VR-AOMI, AOMI and Control groups at T0, T1 and T2 for kinematic indexes during Nine-Hole Peg Test performed with the left hand. Data are shown as mean and standard deviation. Significant results are shown in bold text.

|                                     | VR-AOMI        |                |                | AOMI           |                |                | CTRL           |                |                | Time factor  | Group factor | Time x Group interaction |
|-------------------------------------|----------------|----------------|----------------|----------------|----------------|----------------|----------------|----------------|----------------|--------------|--------------|--------------------------|
|                                     | T0             | T1             | T2             | T0             | T1             | T2             | T0             | T1             | T2             |              |              |                          |
| Test Total Time (s)                 | 22.93 ± 2.76   | 22.96 ± 3.47   | 22.45 ± 3.38   | 22.95 ± 3.51   | 22.42 ± 3.82   | 22.68 ± 3.78   | 22.73 ± 3.92   | 23.16 ± 4.3    | 21.58 ± 4.01   | 0.077        | 0.973        | 0.560                    |
| Removing Tot Time (s)               | 6.97 ± 0.95    | 6.95 ± 1.38    | 6.65 ± 1.24    | 6.85 ± 1.13    | 6.66 ± 1.34    | 5.91 ± 1.7*    | 7.08 ± 1.28    | 7.08 ± 1.31    | 6.37 ± 1.09    | <b>0.003</b> | 0.535        | 0.484                    |
| Peg Grip Tot Time (s)               | 3.94 ± 0.87    | 4.09 ± 1.09    | 4.41 ± 1.30    | 4.17 ± 1.46    | 4.11 ± 1.20    | 4.60 ± 1.71    | 4.09 ± 1.20    | 4.08 ± 1.23    | 4.08 ± 1.26    | 0.055        | 0.882        | 0.349                    |
| Transfer Tot Time (s)               | 4.18 ± 0.67    | 4.00 ± 0.56    | 3.8 ± 0.65*    | 3.86 ± 0.38    | 3.73 ± 0.55    | 3.81 ± 0.50    | 3.88 ± 0.92    | 3.87 ± 0.81    | 3.75 ± 0.77    | <b>0.040</b> | 0.637        | 0.284                    |
| Peg in Hole Tot Time (s)            | 3.75 ± 0.70    | 3.66 ± 0.77    | 3.64 ± 0.62    | 4.08 ± 1.03    | 3.89 ± 1.09    | 3.60 ± 0.64    | 3.31 ± 0.67    | 3.84 ± 0.82    | 3.50 ± 0.83    | 0.261        | 0.475        | 0.088                    |
| Return Tot Time (s)                 | 2.87 ± 0.38    | 2.92 ± 0.40    | 2.77 ± 0.27    | 2.77 ± 0.38    | 2.84 ± 0.39    | 2.65 ± 0.28    | 2.98 ± 0.50    | 3.06 ± 0.64    | 2.75 ± 0.43**  | <b>0.029</b> | 0.368        | 0.696                    |
| N-Jerk Transfer (m/s <sup>3</sup> ) | 272.38 ± 79.43 | 255.35 ± 60.22 | 231.39 ± 62.43 | 236.99 ± 40.98 | 219.82 ± 53.25 | 234.75 ± 45.04 | 240.03 ± 84.51 | 232.76 ± 75.95 | 228.59 ± 69.19 | 0.058        | 0.499        | 0.221                    |
| N-Jerk Return (m/s <sup>3</sup> )   | 170.36 ± 41.78 | 174.69 ± 44.25 | 157.53 ± 25.12 | 163.83 ± 53.90 | 163.73 ± 42.93 | 148.22 ± 30.65 | 186.68 ± 60.76 | 197.41 ± 72.99 | 160.35 ± 45.07 | 0.051        | 0.214        | 0.815                    |
| Vel Transfer (m/s)                  | 0.27 ± 0.29    | 0.26 ± 0.29    | 0.27 ± 0.18    | 0.26 ± 0.2     | 0.26 ± 0.27    | 0.27 ± 0.01    | 0.27 ± 0.03    | 0.27 ± 0.04    | 0.28 ± 0.03    | <b>0.042</b> | 0.419        | 0.437                    |
| Vel Return (m/s)                    | 0.32 ± 0.05    | 0.31 ± 0.04    | 0.32 ± 0.03    | 0.31 ± 0.05    | 0.29 ± 0.02    | 0.33 ± 0.03    | 0.32 ± 0.03    | 0.31 ± 0.03    | 0.34 ± 0.03    | 0.062        | 0.679        | 0.306                    |
| Peak Vel Transfer (m/s)             | 0.58 ± 0.09    | 0.54 ± 0.08    | 0.57 ± 0.07    | 0.56 ± 0.07    | 0.56 ± 0.11    | 0.57 ± 0.07    | 0.58 ± 0.11    | 0.58 ± 0.09    | 0.61 ± 0.09    | 0.274        | 0.642        | 0.320                    |
| Peak Vel Return (m/s)               | 0.72 ± 0.14    | 0.66 ± 0.09    | 0.72 ± 0.11    | 0.72 ± 0.11    | 0.68 ± 0.09    | 0.79 ± 0.11**  | 0.73 ± 0.09    | 0.69 ± 0.09    | 0.79 ± 0.13**  | <b>0.009</b> | 0.436        | 0.205                    |

\* $p < 0.05$  compared to T0 in the same group; \*\* $p < 0.05$  compared to T1 in the same group

**Abbreviations:** **VR-AOMI:** action observation performed through immersive virtual reality group; **AOMI:** action observation group; **CTRL:** control group.

**Table S2.** Comparison between VR-AOMI, AOMI and Control groups at T0 and T2 for kinematic indexes during Nine-Hole Peg Test (NHPT) performed with right hand. Data are shown as mean and standard deviation. Significant results are shown in bold text.

|                                     | VR-AOMI        |                | AOMI           |                | CTRL           |                | Time factor  | Group factor | Time x Group interaction |
|-------------------------------------|----------------|----------------|----------------|----------------|----------------|----------------|--------------|--------------|--------------------------|
|                                     | T0             | T2             | T0             | T2             | T0             | T2             |              |              |                          |
| Test Total Time (s)                 | 21.62 ± 2.84   | 20.51 ± 3.17   | 20.98 ± 2.71   | 22.05 ± 3.39   | 20.89 ± 3.06   | 19.91 ± 3.72   | 0.341        | 0.580        | <b>0.025</b>             |
| Removing Tot Time (s)               | 6.69 ± 1.54    | 6.23 ± 0.99*   | 6.71 ± 1.39    | 6.51 ± 0.97    | 6.50 ± 1.20    | 6.04 ± 1.15*   | <b>0.003</b> | 0.731        | 0.579                    |
| Peg Grip Tot Time (s)               | 3.82 ± 0.90    | 3.70 ± 1.19    | 3.66 ± 0.84    | 4.49 ± 1.75    | 3.74 ± 0.95    | 3.76 ± 1.21    | 0.178        | 0.613        | 0.076                    |
| Transfer Tot Time (s)               | 3.63 ± 0.59    | 3.48 ± 0.69    | 3.55 ± 0.50    | 3.78 ± 0.51    | 3.54 ± 0.51    | 3.39 ± 0.54    | 0.755        | 0.543        | 0.089                    |
| Peg in Hole Tot Time (s)            | 3.31 ± 0.51    | 3.13 ± 0.92    | 3.09 ± 0.74    | 3.43 ± 0.74    | 2.92 ± 0.42    | 2.67 ± 0.68**  | 0.780        | 0.078        | <b>0.043</b>             |
| Return Tot Time (s)                 | 2.90 ± 0.46    | 2.78 ± 0.35    | 2.97 ± 0.45    | 2.78 ± 0.52    | 2.85 ± 0.51    | 2.90 ± 0.59    | 0.194        | 0.965        | 0.328                    |
| N-Jerk Transfer (m/s <sup>3</sup> ) | 218.21 ± 59.90 | 210.34 ± 64.62 | 208.99 ± 45.02 | 233.22 ± 46.60 | 206.81 ± 49.81 | 197.41 ± 40.99 | 0.778        | 0.494        | 0.179                    |
| N-Jerk Return (m/s <sup>3</sup> )   | 184.83 ± 49.99 | 171.61 ± 33.40 | 186.93 ± 58.09 | 165.83 ± 63.15 | 172.68 ± 53.36 | 183.51 ± 54.65 | 0.325        | 0.992        | 0.237                    |
| Vel Transfer (m/s)                  | 0.28 ± 0.03    | 0.28 ± 0.04    | 0.28 ± 0.02    | 0.27 ± 0.01    | 0.28 ± 0.03    | 0.29 ± 0.02    | 0.517        | 0.705        | 0.103                    |
| Vel Return (m/s)                    | 0.31 ± 0.05    | 0.33 ± 0.04    | 0.32 ± 0.03    | 0.32 ± 0.04    | 0.32 ± 0.04    | 0.32 ± 0.04    | 0.510        | 0.992        | 0.426                    |
| Peak Vel Transfer (m/s)             | 0.59 ± 0.09    | 0.60 ± 0.12    | 0.60 ± 0.09    | 0.57 ± 0.06    | 0.61 ± 0.09    | 0.60 ± 0.07    | 0.645        | 0.841        | 0.376                    |
| Peak Vel Return (m/s)               | 0.75 ± 0.12    | 0.77 ± 0.14    | 0.77 ± 0.09    | 0.76 ± 0.11    | 0.74 ± 0.12    | 0.78 ± 0.10    | 0.390        | 0.990        | 0.550                    |

\* $p < 0.05$  compared to T0 of the same group; \*\* $p < 0.05$  compared to AOMI group at the same Time point

**Abbreviations:** **VR-AOMI:** action observation performed through immersive virtual reality group; **AOMI:** action observation group; **CTRL:** control group.
